# Supplementary material
Source: PubMed Central journal article supplement (PMC2098818)

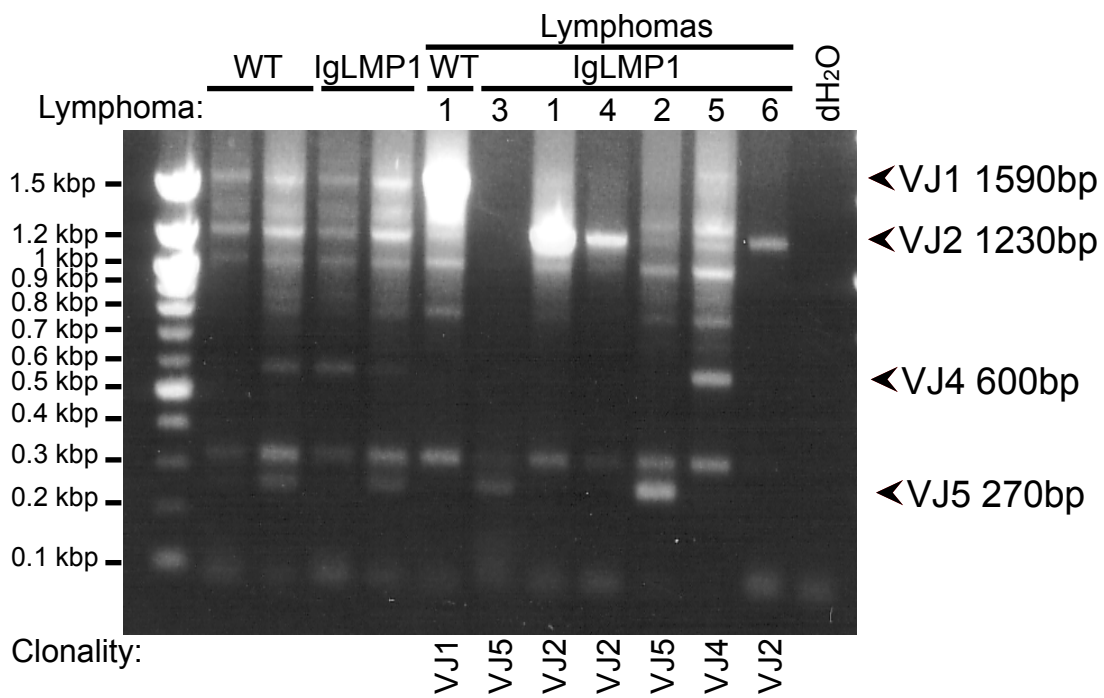

Supplement: ppat.0030166.sg001.pdf [file ppat.0030166.sg001.pdf]
